# Supplementary material for: A highly sensitive and versatile chiral sensor based on a top-gate organic field effect transistor functionalized with thiolated β-cyclodextrin
Source: Royal Society of Chemistry journal article supplement (doi:10.1039/c8an02339e), 2019-01-01
Supplement: c8an02339e1.pdf [file c8an02339e1.pdf]

## Supporting information:

# A Highly Sensitive and Versatile Chiral Sensor Based on Top-Gate Organic Field Effect Transistors Functionalized with Thiolated $\beta$ -Cyclodextrin

Xuepeng Wang<sup>1</sup>, Yong Wang<sup>2,3</sup>, Yifan Wu<sup>1</sup>, Yin Xiao<sup>\*1</sup>

<sup>1</sup>*School of Chemical Engineering and Technology, Tianjin Engineering Research Center of Functional Fine Chemicals, Tianjin University, Tianjin 300072, China*

<sup>2</sup>*Collaborative Innovation Center of Chemical Science and Engineering (Tianjin), Tianjin 300072, China*

<sup>3</sup>*Tianjin Key Laboratory of Molecular Optoelectronic Science, Department of Chemistry, School of Science, Tianjin University, Tianjin 300072, China*

E-mail addresses: [xiaoyin@tju.edu.cn](mailto:xiaoyin@tju.edu.cn)

## Table of Contents

S-2 **Fig. S1** (a) Output and (b) transfer characteristics of the top-gate OFET before and after it was immersed in water for 24 h.

S-3 **Fig. S2** (a) Output and (b) transfer characteristics of the bottom-gate OFET with PMMA before and after it was immersed in water for 24 h.

S-4 **Table S1** Elemental composition of the gold electrode surface before and after SH- $\beta$ -CD assembly from XPS wide energy survey.

S-4 **Fig. S3** XPS fully scanned spectrum of the gold electrode surface before (a) and after (b) SH- $\beta$ -CD assembly.

S-5 **Fig. S4** Output characteristic curves of the OFET with and without SH- $\beta$ -CD.

S-6 **Fig. S5** Sensing response of the COFET to Phe (5 nM)

S-7 **Fig. S6** The real-time responses of the OFET to *D*- and *L*-Phe with and without SH- $\beta$ -CD.

S-8 **Fig. S7** The response of the COFET to phosphate buffered FBS without Ibu.

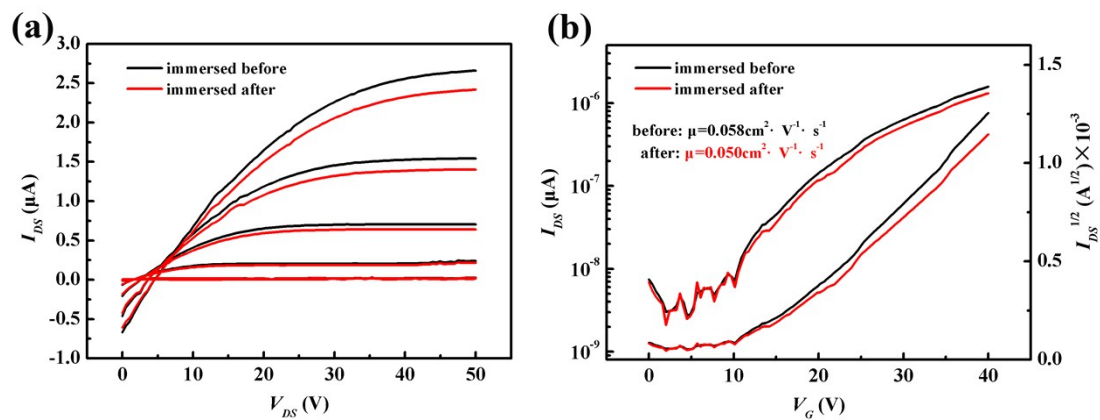

**Fig. S1** (a) Output (a) and (b) transfer characteristics of the top-gate OFET before and after it was immersed in water for 24 h.

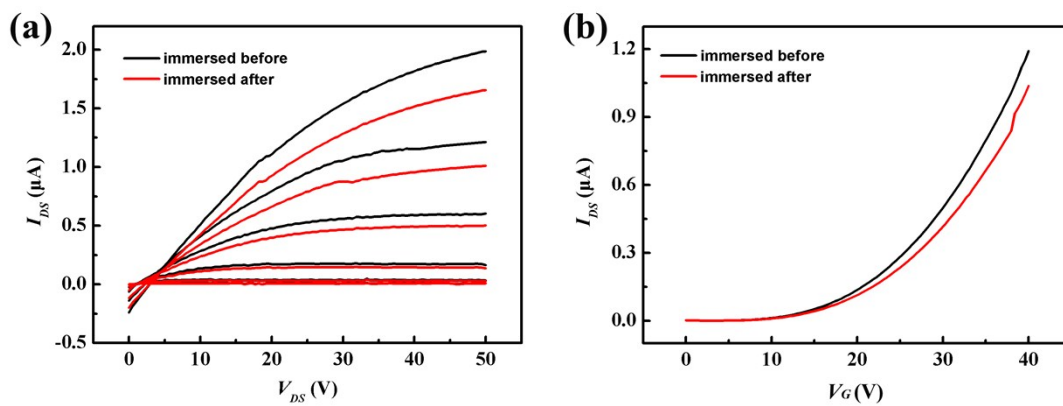

**Fig. S2** (a) Output and (b) transfer characteristics of the bottom-gate OFET with PMMA before and after it was immersed in water for 24 h.

**Table S1** Elemental composition of the gold electrode surface before and after SH- $\beta$ -CD assembly from XPS

| Sample                    | Atomic percentage (%) |      |       |      |       |
|---------------------------|-----------------------|------|-------|------|-------|
|                           | C                     | N    | O     | S    | Au    |
| SH- $\beta$ -CD untreated | 11.31                 | 0.05 | 9.61  | 0    | 79.03 |
| SH- $\beta$ -CD treated   | 35.05                 | 0.83 | 33.13 | 2.18 | 28.82 |

wide energy survey

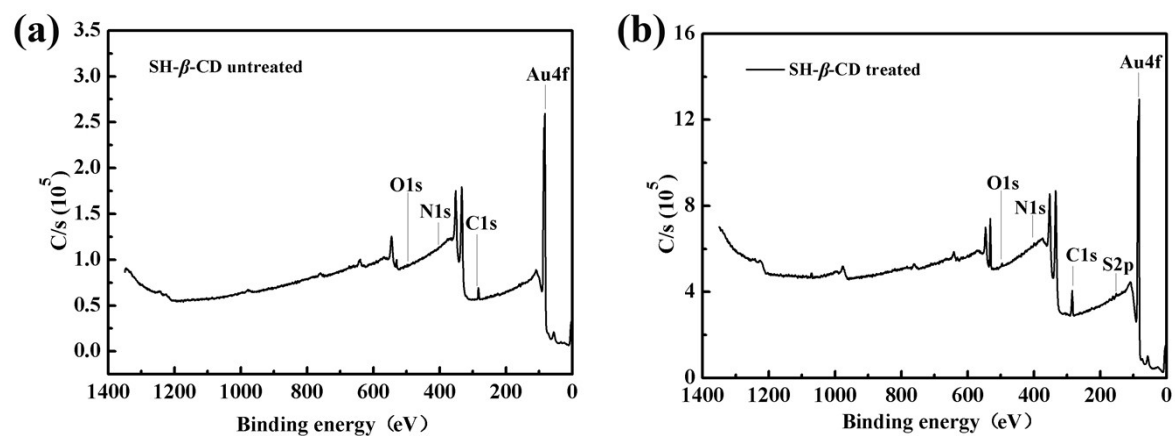

**Fig. S3** XPS fully scanned spectrum of the gold electrode surface before (a) and after (b) SH- $\beta$ -CD assembly.

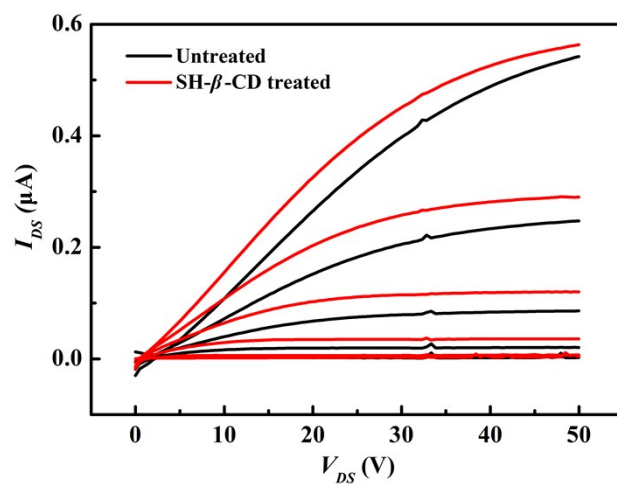

**Fig. S4** Output characteristic curves of the OFET with and without SH- $\beta$ -CD.

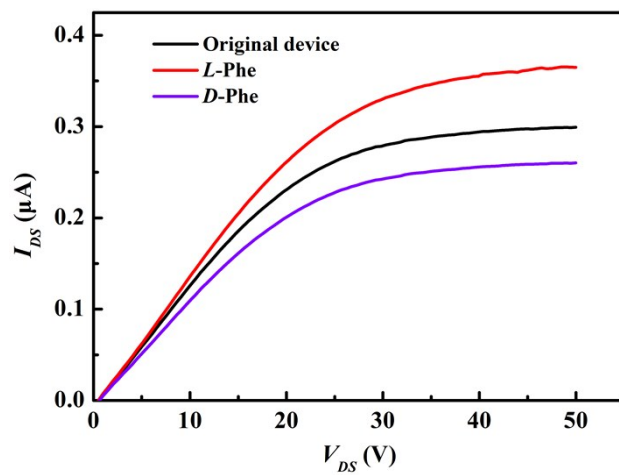

**Fig. S5** Sensing response of the COFET to Phe (5 nM).

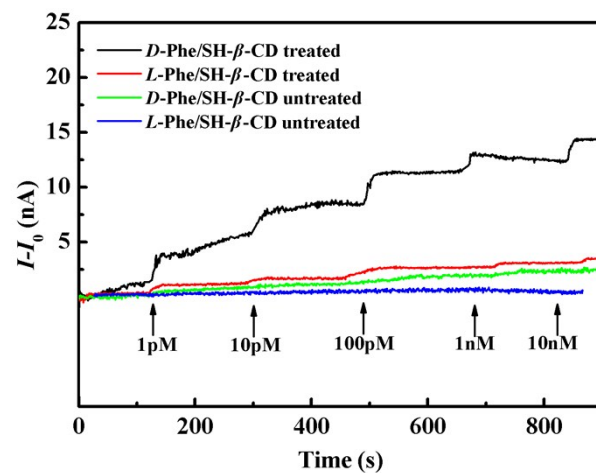

**Fig. S6** The real-time responses of the OFET to *D*- and *L*-Phe with and without SH-β-CD.

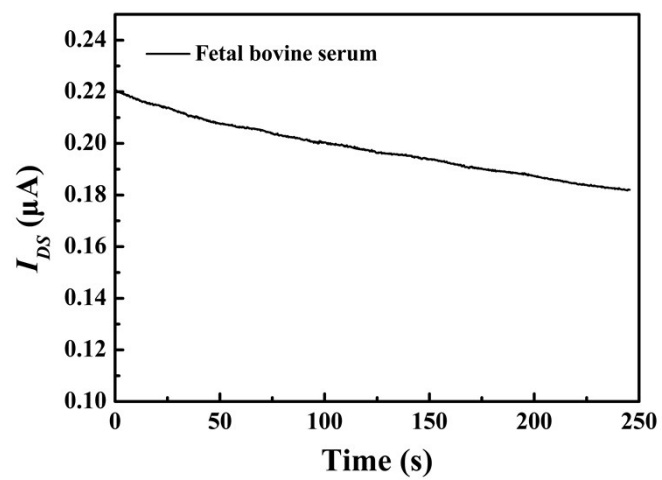

**Fig. S7** The response of the COFET to phosphate buffered FBS without Ibu.
